# Supplementary material
Source: publisher figshare collection journal article supplement (https://acs.figshare.com/ndownloader/files/11438144)
Supplement: Supplementary file 1 [file 11438144]

## Supporting Information

# Photochemical Aging of Beijing Urban PM<sub>2.5</sub>: HONO Production

Fengxia Bao <sup>a,b</sup>, Meng Li <sup>a,b</sup>, Yue Zhang <sup>a,b</sup>, Chuncheng Chen <sup>a,b,\*</sup>, Jincai Zhao <sup>a,b</sup>

<sup>a</sup> *Key Laboratory of Photochemistry, CAS Research/Education Center for Excellence  
in Molecular Sciences, Institute of Chemistry, Chinese Academy of Sciences, Beijing,  
100190, P. R. China*

<sup>b</sup> University of Chinese Academy of Sciences, Beijing, 100049, P. R. China

Corresponding Authors:

Prof. Chuncheng Chen    Email: [ccchen@iccas.ac.cn](mailto:ccchen@iccas.ac.cn)

|    |                                                                                                                                                                        |
|----|------------------------------------------------------------------------------------------------------------------------------------------------------------------------|
| 1  | <b>Table of Contents</b>                                                                                                                                               |
| 2  | <b>Supplementary Methods</b>                                                                                                                                           |
| 3  | Sampling and filter treatment.                                                                                                                                         |
| 4  | Photoreaction system.                                                                                                                                                  |
| 5  | <i>On-line</i> gas measurement.                                                                                                                                        |
| 6  | Actinometry calibration.                                                                                                                                               |
| 7  | HNO <sub>3</sub> loading on different supports.                                                                                                                        |
| 8  | The calibration of HONO measurement.                                                                                                                                   |
| 9  | <b>Supplementary Tables</b>                                                                                                                                            |
| 10 | <b>Table S1.</b> Overview of HONO measurements in Beijing and other cities.                                                                                            |
| 11 | <b>Table S2.</b> <i>J</i> values for nitrate decay on different surfaces.                                                                                              |
| 12 | <b>Table S3.</b> Components of PM <sub>2.5</sub> samples                                                                                                               |
| 13 | <b>Supplementary Figures</b>                                                                                                                                           |
| 14 | <b>Figure S1.</b> A schematic diagram of photochemical experimental setup to study the                                                                                 |
| 15 | photochemical aging of urban PM <sub>2.5</sub> .                                                                                                                       |
| 16 | <b>Figure S2.</b> Growth of SA due to aqueous nitrate photolysis: Plot of the SA                                                                                       |
| 17 | concentration as a function of reaction time upon illumination of the nitrate                                                                                          |
| 18 | actinometer.                                                                                                                                                           |
| 19 | <b>Figure S3.</b> The calibration of NO <sub>x</sub> analyzer measured HONO concentration by the                                                                       |
| 20 | IC measurement of the NO <sub>2</sub> <sup>-</sup> ions.                                                                                                               |
| 21 | <b>Figure S4.</b> The calibration of the NO <sub>x</sub> analyzer measured HONO concentration by the                                                                   |
| 22 | LOPAP HONO analyzer.                                                                                                                                                   |
| 23 | <b>Figure S5.</b> The HONO and NO <sub>2</sub> production from PM <sub>2.5</sub> samples during the                                                                    |
| 24 | irradiation.                                                                                                                                                           |
| 25 | <b>Figure S6.</b> The production rates of HONO ( <i>P</i> <sub>HONO</sub> ) as a function of <b>a.</b> AQI (Air                                                        |
| 26 | Quality index, µg/m <sup>3</sup> ) <b>b.</b> SO <sub>2</sub> concentration (µg/m <sup>3</sup> ) <b>c.</b> NO <sub>2</sub> concentration (µg/m <sup>3</sup> ) <b>d.</b> |
| 27 | CO concentration (µg/m <sup>3</sup> ) of the day when the PM <sub>2.5</sub> was sampled.                                                                               |
| 28 | <b>Figure S7.</b> UV-Vis absorbance of PM <sub>2.5</sub> samples (black, Sample NOV16; red,                                                                            |
| 29 | Sample JUL07; blue, Sample JUL05) as the function of wavelength 200 nm to 800                                                                                          |
| 30 | nm.                                                                                                                                                                    |
| 31 | <b>Figure S8.</b> The photolysis rate constants <i>J</i> <sub>HNO<sub>3</sub>→HONO</sub> as a function of elemental                                                    |
| 32 | carbon (mass percent concentration, %) of different PM <sub>2.5</sub> samples (RH = 60%,                                                                               |
| 33 | temperature = 25 °C).                                                                                                                                                  |

**Figure S9.** The measured  $\text{NO}_3^-$  concentrations of A. freshly collected; B. photochemical aged (10 h irradiation); C photochemical aged (10 h irradiation and another 10 h irradiation with HCl flow)  $\text{PM}_{2.5}$  sample (NOV28).

**Figure S10.** HONO and  $\text{NO}_2$  production from the Beijing urban  $\text{PM}_{2.5}$  (NOV28) with HCl flux without light irradiation.

**Figure S11.** Cumulative (a) HONO production and (b)  $\text{NO}_2$  production from the Beijing urban  $\text{PM}_{2.5}$  (JUL05) as a function of the irradiation time (t) at different RH values.

**Figure S12.** Cumulative HONO production from the Beijing urban  $\text{PM}_{2.5}$  (NOV16) as a function of (a) light intensity and (b) light wavelength; all experiments were conducted at RH = 60%, temperature = 25 °C.

## Supplementary Methods

**Sampling and filter treatment.** The ambient fine particulate matter ( $\text{PM}_{2.5}$ ) (aerodynamic particle size  $< 2.5 \mu\text{m}$ ) was collected on quartz microfiber filters (Whatman, 203 mm  $\times$  254 mm) by a 600/AFPM1001K High Volume Sampler (AMS) operated at a flow rate of  $0.8 \sim 1.0 \text{ m}^3/\text{min}$  for 24 h. The air volume through each filter ranged from 578 to  $1239 \text{ m}^3$ . Samples were collected on the roof of the ten-storey building of the Institute of Chemistry, Chinese Academy of Sciences (ICCAS, 116°19'21.58''E, 39°59'22.68''N) that is located in Haidian District of Beijing, a typical heavily polluted urban area. During collection, an additional filter was placed behind the sampling filter as the exposure blank control to avoid sampling artifact signal. The samples were collected in various seasons from Apr 2016 to Dec 2016. Before sampling, the blank filters were stored in 30% RH and 25 °C. After sampling the filters were stabilized in the same RH and temperature to be weighed, after which the filters were stored at - 20 °C in the freezer. Fractions with given surface area from one randomized-chosen filters were used to perform the photochemical experiments or other analysis.

**Photoreaction system.** The gas supply system was composed of two inlet Teflon tubes. The first line supplied a mixture of ultra-high-purity nitrogen and ultra-high-purity oxygen; the second line supplied humid ultra-high-purity nitrogen through water bubbler. The ratio of total nitrogen to oxygen was 26:7. Relative humidity was monitored with an in-line RH sensor (Vaisala, HMT130). Mass flow

controllers (Beijing Sevenstar electronics Co., Ltd.) were used to adjust the gas flow. The mixed gas flow was then through a custom-made photochemical flow reactor. During the photoreaction process, a fraction of PM<sub>2.5</sub> sample collected on a quartz filter was exposed to simulated solar irradiation of a Xenon lamp (300W) and the water circulating bath (Beijing YKKY Technology Co., Ltd) was employed constantly (5°C ~ 60°C). Light intensity was calibrated by a CEL-NP2000 lightmeter (CEAULIGHT). Before and after the light-exposure experiment, baselines of both HONO and NO<sub>2</sub> were established. With the resident time ~ 6 s of the carrier gas in the reactor, the photolysis loss of HONO and NO<sub>2</sub> during irradiation was negligible. A control experiment was conducted by illuminating the empty flow reactor to correct for HONO and NO<sub>2</sub> generation caused by photolysis of HNO<sub>3</sub> deposited on the flow reactor wall surface.

**On-line gas measurement.** Gases products HONO and NO<sub>x</sub> released during the experiment were flushed out of the reactor by the carrier gas and were detected by a MODEL T200 NO<sub>x</sub> analyzer (Teledyne API). In this analyzer, the reaction of NO with O<sub>3</sub> produces a characteristic luminescence with intensity proportional to the NO concentration, which is the basis of NO detection. A molybdenum catalyst was used to convert HONO and NO<sub>2</sub> to NO, which is used for the detection of HONO and NO<sub>2</sub>. The concentration of HONO and NO<sub>2</sub> was detected by a widely-used method<sup>1, 2</sup>. In this method, a quartz tube (10 cm length and 0.6 cm inner diameter) filled with 1.0 g of crystalline Na<sub>2</sub>CO<sub>3</sub> (Beijing Chemical Works, 99.8%) was used as a denuder between the exit of the flow tube reactor and the NO<sub>x</sub> analyzer. The NO<sub>2</sub> was quantified by passing the effluent flow through this carbonate denuder which traps HONO. The HONO concentration was then indirectly verified as the difference in the signal without and with the carbonate denuder. For each experiment, a new denuder was used to prevent saturation effects. The NO<sub>2</sub> interference trapped by the denuder has been corrected. Before detection of gas products, a NaCl (Beijing Chemical Works, 99.5%) denuder was used to trap HNO<sub>3</sub> which was a potential interference<sup>3</sup>. To eliminate the influence of the unknown dark reactions and processes, dark control experiments were also conducted. The control signals were subtracted from the sample exposure signals when calculating the production rates of HONO and NO<sub>2</sub>.

99 **Actinometry calibration.** To adjust the  $J$  value to ambient sunlight condition (solar  
 100 elevation angle  $\theta = 0^\circ$ ), the radiant output of the solar simulator was quantified by a  
 101 previously developed nitrate actinometer<sup>4</sup> where benzoic acid (BA) serves as an  $\cdot\text{OH}$   
 102 scavenger for the nitrate photolysis product  $\cdot\text{OH}$  forming salicylic acid (SA).  
 103 Sodium nitrate ( $\geq 99\%$ ) was purchased from Acros and Sodium benzoate (99%),  
 104 salicylic acid ( $\geq 99\%$ ) were purchased from Alfa Aesar. The produced SA in the  
 105 actinometer was quantified by a fluorescence spectrometer (Hitachi F-7000) at an  
 106 excitation wavelength of 305 nm and an emission wavelength of 410 nm. The rate of  
 107 SA formation is found from the plot of SA concentration as a function of time as  
 108 shown in **Figure S2**. The aqueous nitrate photolysis rate in the actinometer solution  
 109 exposed to the experimental light source ( $J_{\text{exp}}$ ), was calculated by:

$$J_{\text{exp}} = \frac{[\text{SA}]}{[\text{Nitrate}] \times \text{Yield}(\text{SA}) \times t}$$

110 where  $[\text{SA}]$ , in units of M, is the measured concentration of SA in the actinometer  
 111 after irradiation time( $t$ );  $[\text{Nitrate}]$  is the concentration of nitrate added in the  
 112 actinometer;  $\text{Yield}(\text{SA})$  is the yield of SA from the reaction of  $\cdot\text{OH}$  radical and  
 113 benzoate. To be noted, since the photolysis of homogenous nitrate and the  $\text{HNO}_3$   
 114 adsorbed in  $\text{PM}_{2.5}$  should have different wavelength dependences, the use of nitrate  
 115 actinometry to determine the light intensity may have some uncertainty. However,  
 116 by using  $J_{\text{exp}}$  as a standard, the photolysis rate constants of HONO and  $\text{NO}_2$  can be  
 117 facilely normalized to the light intensity condition at tropical noontime and can be  
 118 conveniently compared with other studies<sup>5, 6, 7, 8</sup>.

119  **$\text{HNO}_3$  loading on different supports.**  $\text{HNO}_3$  was introduced into the system by  
 120 flowing the ultrahigh purity (UHP) nitrogen over the 16 M  $\text{HNO}_3$  solution kept in a  
 121 reservoir that was maintained at a constant temperature ( $25^\circ\text{C}$ ). The concentration of  
 122  $\text{HNO}_3$  vapor was determined by IC measurement of  $\text{NO}_3^-$  ions produced from  
 123 dissolution of  $\text{HNO}_3$  in  $\text{Na}_2\text{CO}_3$  solution. The flow of UHP  $\text{N}_2$  was  $500 \text{ ml}\cdot\text{min}^{-1}$  in  
 124 the chamber and led to the constant  $\text{HNO}_3$  vapor flow concentration between 0.11  
 125  $\mu\text{g}/\text{ml}$  to 0.15  $\mu\text{g}/\text{ml}$  through the sample chamber. To minimize  $\text{NO}_2$  impurity in  
 126  $\text{HNO}_3$ , we purged  $\text{NO}_2$  by bubbling the liquid  $\text{HNO}_3$  for about 60 min with a steady  
 127 flow of nitrogen. Before each experiment, the system was passivated with  $\text{HNO}_3$  for  
 128 30 min to obtain a stable  $\text{HNO}_3$  vapor concentration. The gaseous  $\text{HNO}_3$  source was  
 129 connected to the reactor with the supports for overnight (10 h) to make sure that the

adsorption was saturated before each photolysis experiment. The supports including PM<sub>2.5</sub> sample (JUL07), Al<sub>2</sub>O<sub>3</sub> (Alfa,  $\gamma$ -phase 99.9%, ~40  $\mu$ m), TiO<sub>2</sub> (Acros,  $\geq$ 98%, ~4  $\mu$ m), blank quartz filter and pyrex glass were tested, respectively. PM<sub>2.5</sub> sample, the blank quartz filter or the pyrex glass were directly placed on the bottom of the reactor, and for Al<sub>2</sub>O<sub>3</sub> or TiO<sub>2</sub>, 400 mg of this powder sample was uniformly spread on the bottom. The amount of HNO<sub>3</sub> adsorbed on the supports was quantified by washing the supports with deionized water after the irradiation, followed by detecting nitrate in the washing solution.

**The calibration of HONO measurement.** The HONO production was calibrated by IC measurement of NO<sub>2</sub><sup>-</sup> ions produced from dissolution of HONO. We conducted several HONO production experiments on our PM<sub>2.5</sub> samples with different RH values (0 ~ 60%). The gas product was simultaneously measured by NO<sub>x</sub> analyzer and IC (by the dissolution of HONO into water). The HONO concentrations in both analyses were conducted by the subtractive method of measured concentration with or without Na<sub>2</sub>CO<sub>3</sub> denuder. The calibration results see **Figure S3**, which suggested that the measured HONO production by the NO<sub>x</sub> analyzer was nearly identical with the IC measured value. Besides, the HONO production measured by the NO<sub>x</sub> analyzer was also calibrated by a long-path absorption photometer (LOPAP) HONO analyzer. The mechanism of the LOPAP analyzer was based on the long path-length absorbance spectroscopy<sup>9, 10, 11</sup>.

## Supplementary Tables

**Table S1.** Overview of HONO measurements in Beijing and other cities.

| Location            | Date            | HONO(ppb)    | Unknown sources (ppbV/hr) | Ref. |
|---------------------|-----------------|--------------|---------------------------|------|
| Paris/France        | Jul 2009        | 0.10–0.21    |                           | 12   |
|                     | Jan - Feb 2010  | 0.40–0.5     |                           |      |
| Pabstthum/Germany   | July - Aug 1998 | 0.20         |                           | 13   |
| Rome/Italy          | May - June 2001 | 0.58         |                           | 14   |
| EI Arenosillo/Spain | Nov - Dec 2008  | 0.08         |                           | 15   |
| Houston/America     | Sep 2006        | 0.30         |                           | 16   |
| Barrow/Alaska       | Mar - Apr 2009  | 0.03         |                           | 17   |
| Ontario/Canada      | Jun - Jul 2007  | 0.06 (Day)   |                           | 18   |
|                     |                 | 0.10 (Night) |                           |      |
| Tokyo/Japan         | Jan - Feb 2004  | 0.43         |                           | 19   |
| Seoul/Korea         | May - July 2005 | 0.36         |                           | 20   |

|                   |                     |                                       |              |           |
|-------------------|---------------------|---------------------------------------|--------------|-----------|
| Shanghai/China    | Aug 2010 - Jun 2012 | 0.92                                  |              | 21        |
| Back Garden/China | Jun 2006            | 0.24 (Day)<br>0.95 (Night)            |              | 22        |
| Hong Kong/China   | Aug 2011- May 2012  | 0.35-0.93                             |              | 23        |
| Beijing/China     | Feb 2014 - Mar 2014 | 0.49-3.24 (Haze)<br>0.28-1.52 (Clean) | 1.85<br>1.26 | 24        |
| Beijing/China     | Sep 2015 - Jul 2016 | 1.44                                  | 1.30-3.82    | 25        |
| Beijing/China     | Aug 2007            | 1.45                                  |              | 26        |
| Beijing/China     | Jan - Feb 2007      | 1.04                                  |              | 26        |
| Beijing/China     | 18 - 31 Aug 2006    | 0.3-0.5 (Day)<br>0.8-3.7 (Night)      | 1.0          | 27        |
| Beijing/China     | Apr - Dec 2016      |                                       | 0.12-4.57    | This work |

152

153

**Table S2.** *J* values for nitrate decay on different surfaces.

| Surface                                                   | $J_{\text{HNO}_3 \rightarrow \text{HONO}} (10^{-6} \text{ s}^{-1})$ | $J_{\text{HNO}_3 \rightarrow \text{NO}_2} (10^{-6} \text{ s}^{-1})$ | Yield ratio<br>HONO/NO <sub>2</sub> |
|-----------------------------------------------------------|---------------------------------------------------------------------|---------------------------------------------------------------------|-------------------------------------|
| PM <sub>2.5</sub> ( JUL07) <sup>a</sup>                   | 1.77                                                                | 0.23                                                                | 7.70                                |
| HNO <sub>3</sub> deposited Al <sub>2</sub> O <sub>3</sub> | 0.64                                                                | 3.64                                                                | 0.18                                |
| HNO <sub>3</sub> deposited TiO <sub>2</sub>               | 0.65                                                                | 3.63                                                                | 0.18                                |
| HNO <sub>3</sub> deposited filter                         | ND <sup>b</sup>                                                     | ND <sup>b</sup>                                                     | -                                   |
| HNO <sub>3</sub> deposited glass                          | ND <sup>b</sup>                                                     | ND <sup>b</sup>                                                     | -                                   |

154

155

156

157

158

159

<sup>a</sup> With pre-adsorbed HNO<sub>3</sub>,  $D_{\text{NO}_3^-}$  is much higher. Therefore, the *J* value of Jul07 here is lower than that of the original PM<sub>2.5</sub> samples, as suggested in **Figure 1b**. <sup>b</sup> ND = Not detectable (The lower detection limit of T200 Teledyne NOx analyzer is 0.4 ppb.)

**Table S3.** Components (mass percent concentration) of different PM<sub>2.5</sub> samples<sup>a</sup>

| Item           | Component                     | SEP05<br>(%) | JUL06<br>(%) | SEP06<br>(%) | DEC12<br>(%) | OCT13<br>(%) | JUL07<br>(%) |
|----------------|-------------------------------|--------------|--------------|--------------|--------------|--------------|--------------|
| 1              | Element Carbon                | 5.00         | 32.86        | 40.00        | 48.00        | 51.35        | 48.50        |
| 2              | Organic Carbon                | 10.00        | 55.71        | 20.00        | 32.00        | 33.78        | 48.50        |
| 3 <sup>a</sup> | Cl <sup>-</sup>               | 0.82         | 0.02         | 0.29         | 0.17         | 0.15         | 0.03         |
| 4              | NO <sub>3</sub> <sup>-</sup>  | 1.06         | 0.30         | 1.03         | 0.83         | 4.31         | 0.89         |
| 5              | SO <sub>4</sub> <sup>2-</sup> | 4.33         | 0.91         | 3.02         | 0.65         | 1.45         | 1.79         |

|                |                               |       |      |       |      |      |      |
|----------------|-------------------------------|-------|------|-------|------|------|------|
| 6              | PO <sub>4</sub> <sup>3-</sup> | 2.64  | 0.08 | 0.94  | 0.23 | 0.07 | -    |
| 7 <sup>b</sup> | Al                            | 3.89  | 0.11 | 2.39  | 0.31 | 0.37 | 0.01 |
| 8              | Ti                            | 0.52  | 0.02 | 0.28  | 0.03 | 0.04 | -    |
| 9              | Cr                            | 2.16  | 0.02 | 0.35  | 0.04 | 0.05 | 0.01 |
| 10             | Mn                            | 0.40  | 0.03 | 0.19  | 0.05 | 0.05 | 0.01 |
| 11             | Sn                            | -     | 0.01 | -     | -    | 0.01 | -    |
| 12             | Ni                            | -     | -    | 0.09  | 0.01 | 0.00 | -    |
| 13             | Cu                            | -     | 0.02 | 0.11  | 0.02 | 0.02 | -    |
| 14             | Zn                            | 0.39  | 0.07 | 0.52  | 0.09 | 0.11 | -    |
| 15             | Ba                            | 0.18  | 0.01 | 0.08  | 0.02 | 0.02 | -    |
| 16             | Pb                            | 0.27  | 0.04 | 0.31  | 0.07 | 0.07 | 0.01 |
| 17             | Ca                            | 2.82  | 0.09 | 5.67  | 1.61 | 1.05 | 0.03 |
| 18             | Na                            | 22.26 | 0.02 | 15.42 | 3.82 | 2.07 | 0.01 |
| 19             | K                             | 0.76  | 0.23 | 2.80  | 0.56 | 0.49 | -    |
| 20             | Fe                            | 26.91 | 4.71 | 7.87  | 5.58 | 1.83 | 0.02 |
| 21             | Mg                            | 2.02  | 0.02 | 1.70  | 0.40 | 0.31 | 0.01 |
| 22             | others                        | 13.53 | 4.74 | -3.05 | 5.53 | 2.39 | 0.18 |

<sup>a</sup> Components of PM<sub>2.5</sub> samples: inorganic ions were measured by an ICS-900 ion chromatograph (DIONEX); metallic elements were measured by a 7700 ICP-MS (Agilent); elemental carbon and organic carbon were measured by a Pyris-1 Thermogravimetric Analyzer (PerkinElmer) and a Nicolet iS5 ATR-IR (Thermo).

## Supplementary Figures

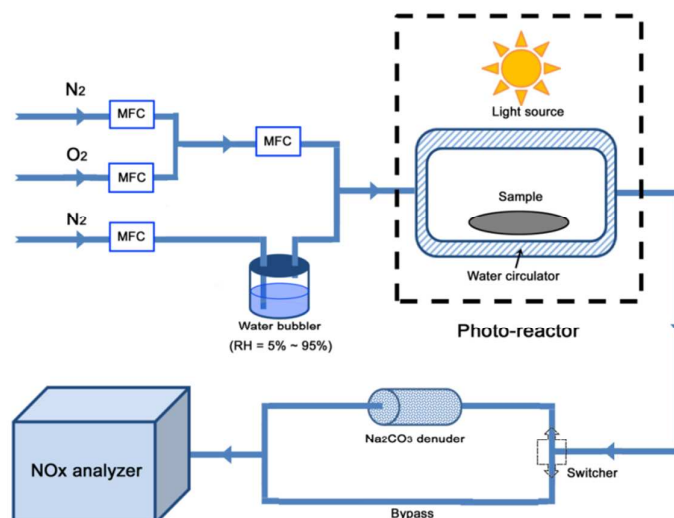

**Figure S1.** A schematic diagram of photochemical experimental setup to study the photochemical aging of urban PM<sub>2.5</sub>.



169

170

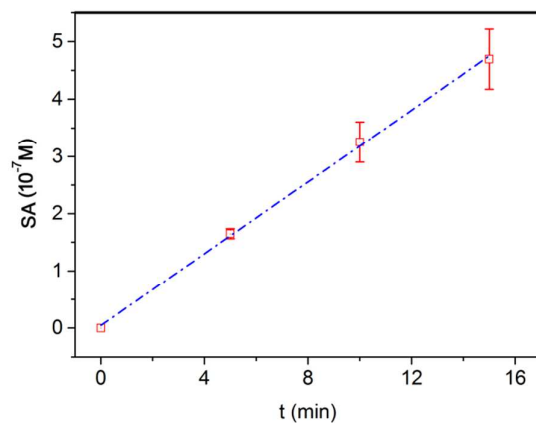

171

172 **Figure S2.** Growth of SA due to aqueous nitrate photolysis: Plot of the SA  
 173 concentration as a function of reaction time (t) upon illumination of the nitrate  
 174 actinometer.

175

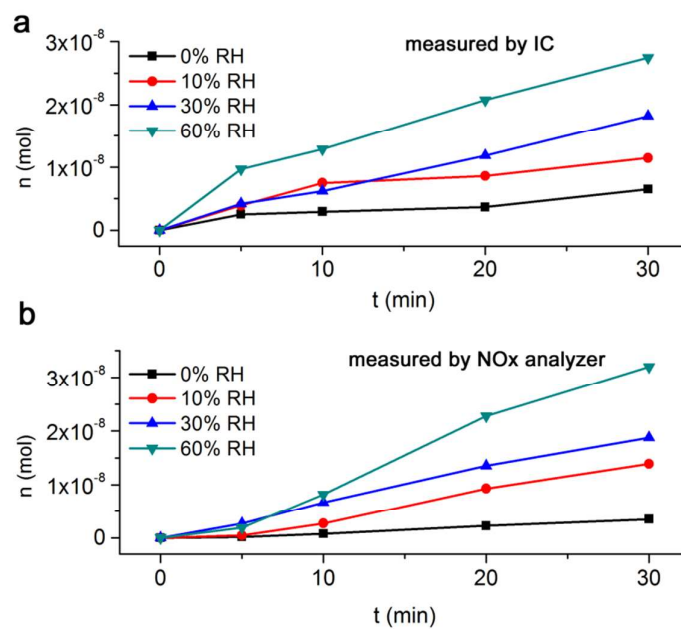

176

177 **Figure S3.** The calibration of NO<sub>x</sub> analyzer measured HONO concentration by the  
 178 IC measurement of the NO<sub>2</sub><sup>-</sup> ions. Several HONO production experiments on the  
 179 PM<sub>2.5</sub> sample (JUL06) with different RH values (0 ~ 60%) were conducted for 30  
 180 min. Result showed that the measured HONO production by the NO<sub>x</sub> analyzer was  
 181 nearly identical with the IC measured value.

182

183

184

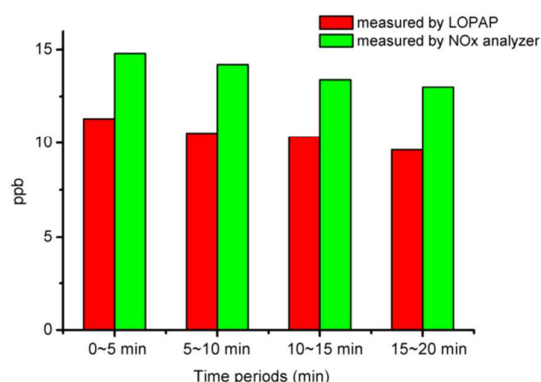

185

186 **Figure S4.** The calibration of the NO<sub>x</sub> analyzer measured HONO concentration by the  
 187 LOPAP HONO analyzer. The HONO production experiments on the PM<sub>2.5</sub> sample  
 188 (JUL06) under irradiation for different time periods were measured by both LOPAP  
 189 and NO<sub>x</sub> analyzer. Result showed that the discrepancy between HONO production  
 190 values measured by different methods was within 3 ppb range. The Teledyne NO<sub>x</sub>  
 191 analyzer detects indirectly the HONO by using a carbonate denuder to adsorb HONO.  
 192 The carbonate denuder may adsorb a small quantity of other nitrogen species (such as  
 193 N<sub>2</sub>O<sub>5</sub>) which can also cause interferences when using molybdenum converters in NO<sub>x</sub>

194 analyzer<sup>28</sup>. Therefore, HONO measured by NO<sub>x</sub> analyzer may be slightly higher than  
195 that by LOPAP.

196

197

198

199

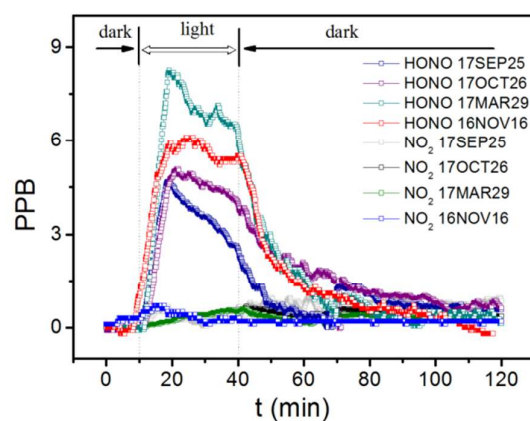

200

201 **Figure S5.** The HONO and NO<sub>2</sub> production from PM<sub>2.5</sub> samples during the  
202 irradiation. Samples includes 17SEP25, 17OCT26, 17MAR29 (collected in 2017)  
203 and 16NOV16(collected in 2016).

204

205

206

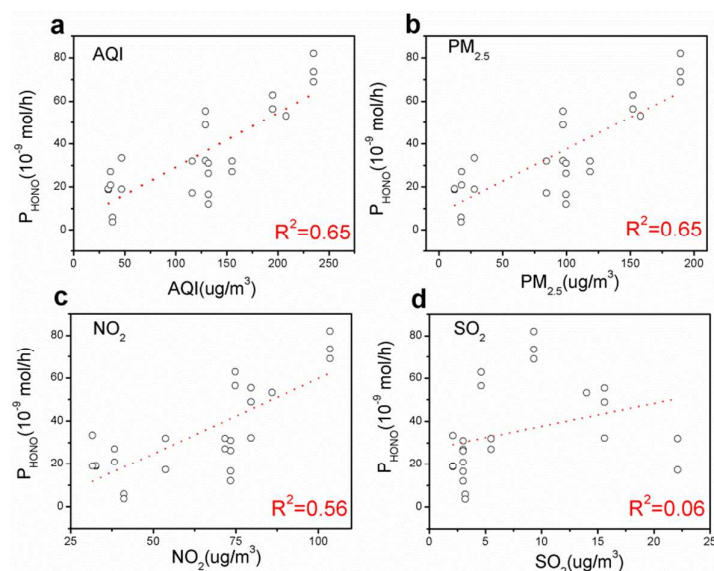

207

208 **Figure S6.** The production rates of HONO ( $P_{\text{HONO}}$ ) as a function of **a.** AQI (Air  
 209 Quality index,  $\mu\text{g}/\text{m}^3$ ) **b.**  $\text{PM}_{2.5}$  concentration ( $\mu\text{g}/\text{m}^3$ ) **c.**  $\text{NO}_2$  concentration ( $\mu\text{g}/\text{m}^3$ )  
 210 **d.**  $\text{SO}_2$  concentration ( $\mu\text{g}/\text{m}^3$ ) of the day when the  $\text{PM}_{2.5}$  was sampled. The  
 211 parameters for the weather conditions were obtained from China real-time air quality  
 212 monitoring and assessment platform (<https://www.aqistudy.cn/historydata/>).

213

214

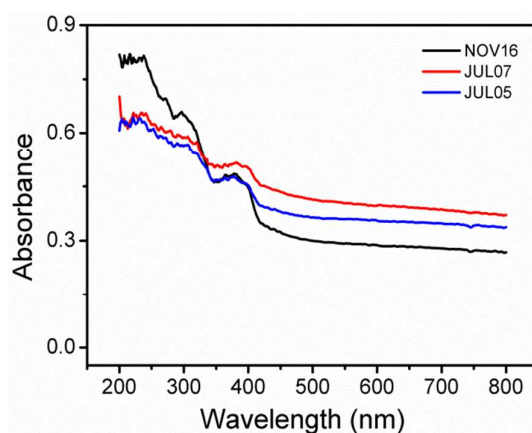

215

216 **Figure S7.** UV-Vis absorbance of  $\text{PM}_{2.5}$  samples (black, Sample NOV16; red,

217 Sample JUL07; blue, Sample JUL05) as the function of wavelength 200 nm to 800  
 218 nm.

219

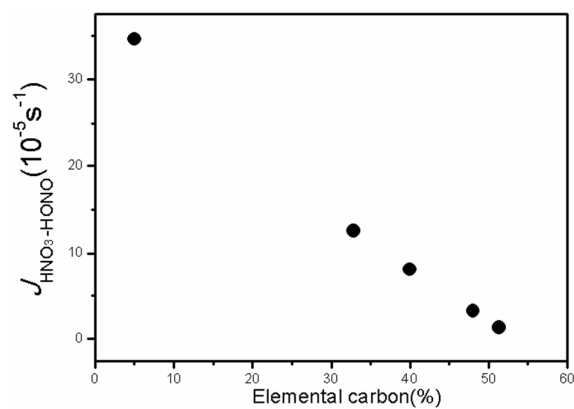

220

221 **Figure S8.** The photolysis rate constants  $J_{\text{HNO}_3 \rightarrow \text{HONO}}$  as a function of elemental  
 222 carbon (mass percent concentration, %) of different  $\text{PM}_{2.5}$  samples (RH = 60%,  
 223 temperature = 25 °C).

224

225

226

227

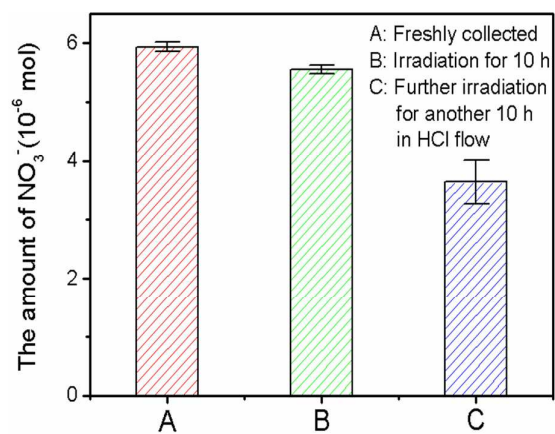

228

229 **Figure S9.** The measured  $\text{NO}_3^-$  concentrations of A: freshly collected; B:  
 230 photochemical aged (10 h irradiation); C: photochemical aged (further irradiation  
 231 with another 10 h in HCl flow)  $\text{PM}_{2.5}$  sample (NOV28). The amount of  $\text{NO}_3^-$   
 232 decreased from  $5.55 \times 10^{-6}$  mol to  $3.64 \times 10^{-6}$  mol after irradiation of 10 h in HCl  
 233 flux, which means that much more  $\text{NO}_3^-$  (34%) is lost than that in the first irradiation  
 234 of 10 h without HCl (5%). Besides the photoreaction, the direct evaporation of the  
 235  $\text{HNO}_3$  from the  $\text{PM}_{2.5}$  during the purging of HCl may also be responsible for the  
 236 large loss of  $\text{NO}_3^-/\text{HNO}_3$ , since the nitrate ions were detected in the outlet of HCl  
 237 flux.

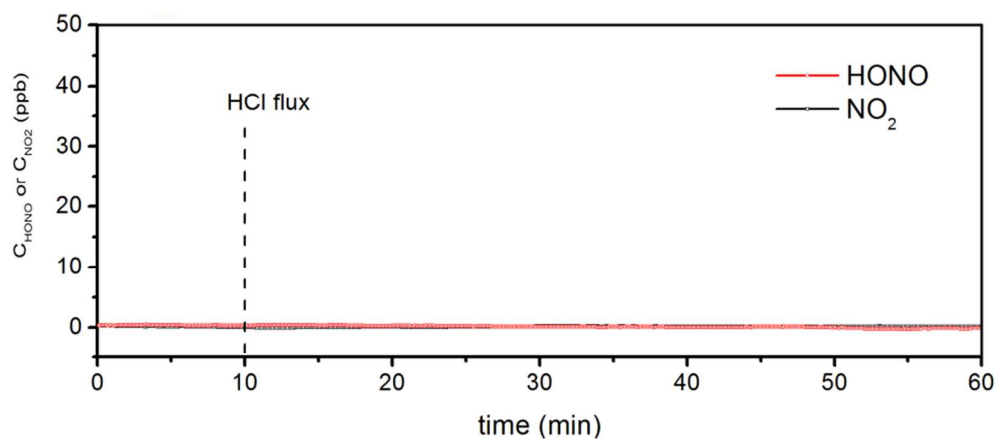

241  
 242 **Figure S10.** HONO and  $\text{NO}_2$  production from the Beijing urban  $\text{PM}_{2.5}$  (NOV28)  
 243 with HCl flux without light irradiation.

246

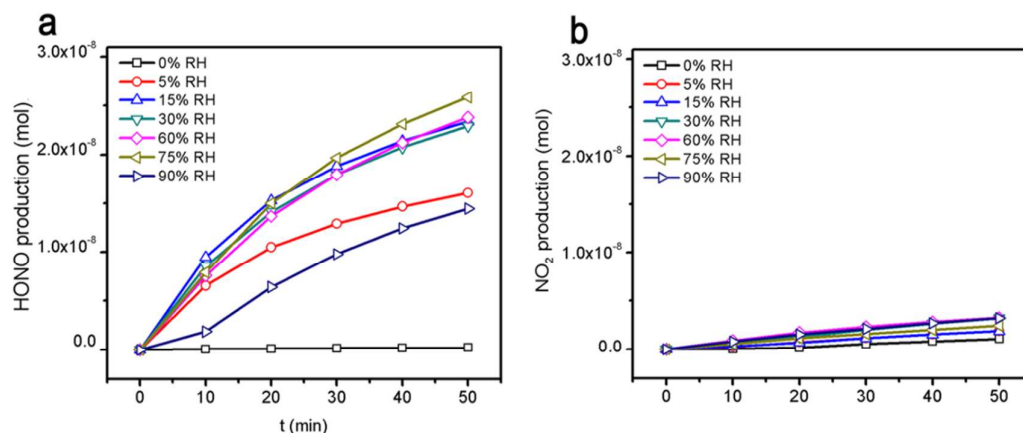

247

248 **Figure S11.** Cumulative (a) HONO production and (b) NO<sub>2</sub> production from the  
 249 Beijing urban PM<sub>2.5</sub> (JUL05) as a function of the irradiation time (t) at different RH  
 250 values.

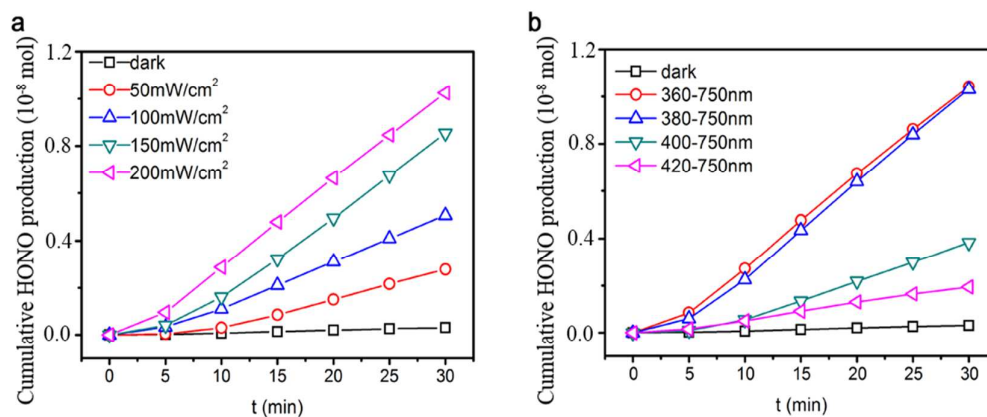

251

252 **Figure S12.** Cumulative HONO production from the Beijing urban PM<sub>2.5</sub> (NOV16)  
 253 as a function of irradiation time at different (a) light intensity and (b) light  
 254 wavelength; all experiments were conducted at RH = 60%, temperature = 25 °C.

255     **References.**

- 256     1. Monge, M. E.; D'Anna, B.; Mazri, L.; Giroir-Fendler, A.; Ammann, M.; Donaldson, D. J.; George,  
257     C., Light changes the atmospheric reactivity of soot. *Proc. Nat. Ac. Sci. U.S.A* **2010**, *107*, 6605-6609.
- 258     2. Han, C.; Yang, W.; Wu, Q.; Yang, H.; Xue, X., Heterogeneous Photochemical Conversion of NO<sub>2</sub>  
259     to HONO on the Humic Acid Surface under Simulated Sunlight. *Environ. Sci. Technol.* **2016**, *50*,  
260     5017-5023.
- 261     3. Vlasenko, A.; Huthwelker, T.; GãGgeler, H. W.; Ammann, M., Kinetics of the heterogeneous  
262     reaction of nitric acid with mineral dust particles: an aerosol flowtube study. *Phys. Chem. Chem.*  
263     *Phys.* **2009**, *11*, 7921-30.
- 264     4. Jankowski, J. J.; Kieber, D. J.; Mopper, K.; Neale, P. J., Development and Intercalibration of  
265     Ultraviolet Solar Actinometers. *J. Photochem. Photobiol.* **2000**, *71*, 431.
- 266     5. Baergen, A. M.; Donaldson, D. J., Photochemical renoxification of nitric acid on real urban  
267     grime. *Environ. Sci. Technol.* **2013**, *47*, 815-820.
- 268     6. Ye, C.; Gao, H.; Zhang, N.; Zhou, X., Photolysis of Nitric Acid and Nitrate on Natural and  
269     Artificial Surfaces. *Environ. Sci. Technol.* **2016**, *50*, 3530-3536.
- 270     7. Ye, C.; Zhang, N.; Gao, H.; Zhou, X., Photolysis of particulate nitrate as a source of HONO  
271     and NO<sub>x</sub>. *Environ. Sci. Technol.* **2017**, *51*, 6849-6856.
- 272     8. Ye, C.; Zhou, X.; Pu, D.; Stutz, J.; Festa, J.; Spolaor, M.; Tsai, C.; Cantrell, C.; Mauldin, R. L.,  
273     III; Campos, T.; Weinheimer, A.; Hornbrook, R. S.; Apel, E. C.; Guenther, A.; Kaser, L.; Yuan, B.;  
274     Karl, T.; Haggerty, J.; Hall, S.; Ullmann, K.; Smith, J. N.; Ortega, J.; Knote, C., Rapid cycling of  
275     reactive nitrogen in the marine boundary layer. *Nature* **2016**, *532*, 489-91.

276



- 277 9. Kleffmann, J.; Heland, J.; Kurtenbach, R.; Lörzer, J. C.; Wiesen, P., A new instrument (LOPAP)  
278 for the detection of nitrous acid (HONO). *Environ. Sci. Pollut. R.* **2002**, *9*, 48-54.
- 279 10. Huang, G.; Zhou, X.; Deng, G., Measurements of atmospheric nitrous acid and nitric acid. *Atmos.*  
280 *Environ.* **2002**, *36*, 2225-2235.
- 281 11. Heland, J.; Kleffmann, J.; Kurtenbach, R.; Wiesen, P., A new instrument to measure gaseous  
282 nitrous acid (HONO) in the atmosphere. *Environ. Sci. Technol.* **2001**, *35*, 3207.
- 283 12. Michoud, V.; Colomb, A.; Borbon, A.; Miet, K.; Beekmann, M.; Camredon, M.; Aumont, B.;  
284 Perrier, S.; Zapf, P.; Siour, G., Study of the unknown HONO daytime source at a European suburban  
285 site during the MEGAPOLI summer and winter field campaigns. *Atmos. Chem. Phys.* **2014**, *14*,  
286 2805-2822.
- 287 13. Icke, B.; Geyer, A.; Hofzumahaus, A.; Holland, F.; Konrad, S.; Pätz, H. W.; Schäfer, J.; Stutz, J.;  
288 Volz-Thomas, A.; Platt, U., OH formation by HONO photolysis during the BERLIOZ experiment. *J.*  
289 *Geophys. Res.* **2003**, *108*, PHO-1-PHO 3-17.
- 290 14. Ker, K.; Febo, A.; Trick, S.; Perrino, C.; Bruno, P.; Wiesen, P.; Möller, D.; Wieprecht, W.; Auel,  
291 R.; Giusto, M., Nitrous acid in the urban area of Rome. *Atmos. Environ.* **2006**, *40*, 3123-3133.
- 292 15. Rigel, M. S.; Regelin, E.; Bozem, H.; Diesch, J. M.; Drewnick, F.; Fischer, H.; Harder, H.; Held,  
293 A.; Hosaynalibeygi, Z.; Martinez, M., Quantification of the unknown HONO daytime source and its  
294 relation to NO<sub>2</sub>. *Atmos. Chem. Phys.* **2011**, *11*, 10433-10447.
- 295 16. Wong, K. W.; Oh, H. J.; Lefer, B. L.; Rappenglück, B.; Stutz, J., Vertical profiles of nitrous acid  
296 in the nocturnal urban atmosphere of Houston, TX. *Atmos. Chem. Phys. Discuss.* **2010**, *10*,  
297 3595-3609.
- 298 17. Villena, G.; Wiesen, P.; Cantrell, C. A.; Flocke, F.; Fried, A.; Hall, S. R.; Hornbrook, R. S.;

299 Knapp, D.; Kosciuch, E.; Iii, R. L. M., Nitrous acid (HONO) during polar spring in Barrow, Alaska:  
 300 A net source of OH radicals? *J. Geophys. Res. Atmos.* **2011**, *116*, 191-200.  
 301 18. Wentzell, J. J. B.; Schiller, C. L.; Harris, G. W., Measurements of HONO during BAQS-Met.  
 302 *Atmos. Chem. Phys. Discuss.* **2010**, *10*, 12285-12293.  
 303 19. Kanaya, Y.; Cao, R.; Akimoto, H.; Fukuda, M.; Komazaki, Y.; Yokouchi, Y.; Koike, M.;  
 304 Tanimoto, H.; Takegawa, N.; Kondo, Y., Urban photochemistry in central Tokyo: 1. Observed and  
 305 modeled OH and HO<sub>2</sub> radical concentrations during the winter and summer of 2004. *J. Geophys. Res.*  
 306 **2007**, *112*, D21312.  
 307 20. Song, C. H.; Mi, E. P.; Lee, E.; Lee, J. H.; Bo, K. L.; Dong, S. L.; Kim, J.; Han, J. S.; Moon, K. J.;  
 308 Kondo, Y., Possible particulate nitrite formation and its atmospheric implications inferred from the  
 309 observations in Seoul, Korea. *Atmos. Environ.* **2009**, *43*, 2168-2173.  
 310 21. Wang, S.; Zhou, R.; Zhao, H.; Wang, Z.; Chen, L.; Zhou, B., Long-term observation of  
 311 atmospheric nitrous acid (HONO) and its implication to local NO<sub>2</sub> levels in Shanghai, China. *Atmos.*  
 312 *Environ.* **2013**, *77*, 718-724.  
 313 22. Li, X.; Brauers, T.; Seler, R. H.; Bohn, B.; Fuchs, H.; Hofzumahaus, A.; Holland, F.; Lou, S.; Lu,  
 314 K. D.; Rohrer, F., Exploring the atmospheric chemistry of nitrous acid (HONO) at a rural site in  
 315 Southern China. *Atmos. Chem. Phys. Discuss.* **2011**, *11*, 27591-27635.  
 316 23. Xu, Z.; Wang, T.; Wu, J.; Xue, L.; Chan, J.; Zha, Q.; Zhou, S.; Louie, P. K. K.; Luk, C. W. Y.,  
 317 Nitrous acid (HONO) in a polluted subtropical atmosphere: Seasonal variability, direct vehicle  
 318 emissions and heterogeneous production at ground surface. *Atmos. Environ.* **2015**, *106*, 100-109.  
 319 24. Hou, S.; Tong, S.; Ge, M.; An, J., Comparison of atmospheric nitrous acid during severe haze and  
 320 clean periods in Beijing, China. *Atmos. Environ.* **2016**, *124*, 199-206.

- 321 25. Wang, J.; Zhang, X.; Guo, J.; Wang, Z.; Zhang, M., Observation of nitrous acid (HONO) in  
322 Beijing, China: Seasonal variation, nocturnal formation and daytime budget. *Sci. Total Environ.* **2017**,  
323 *s* 587–588, 350-359.
- 324 26. Spataro, F.; Ianniello, A.; Esposito, G.; Allegrini, I.; Zhu, T.; Hu, M., Occurrence of atmospheric  
325 nitrous acid in the urban area of Beijing (China). *Sci. Total Environ.* **2013**, *447*, 210-224.
- 326 27. Qiang, Y.; Hang, S. U.; Xin, L. I.; Cheng, Y. F.; Keding, L. U.; Peng, C.; Jianwei, G. U.; Song,  
327 G.; Min, H. U.; Zeng, L. M., Daytime HONO formation in the suburban area of the megacity Beijing,  
328 China. *Sci. China. Chem.* **2014**, *57*, 1032-1042.
- 329 28. Wei, C.; Zeng, L.; Yusheng, W. U., An comparative analysis of the accuracy of atmospheric NO<sub>x</sub>  
330 measurements. *Acta Scien. Circum.* **2013**, *33*, 346-355.

331

332

333

334
